# Supplementary material for: An immunohistochemical study of lymphatic elements in the human brain
Source: PubMed Central journal article supplement — Proc Natl Acad Sci U S A. 2021 Jan 14;118(3):e2002574118. doi: 10.1073/pnas.2002574118 (PMC7826383; doi:10.1073/pnas.2002574118), 2021-01-14
Supplement: pnas.2002574118.sapp.pdf [file pnas.2002574118.sapp.pdf]

# PNAS

[www.pnas.org](http://www.pnas.org)

Supplementary Information for:

An immunohistochemical study of the lymphatic elements in the human brain

Mezey É, Szalayova, I, Hogden, C.T., Brady, A, Dósa, Á, Sótonyi, P, Palkovits, M

Email: [mezeye@mail.nih.gov](mailto:mezeye@mail.nih.gov)

[palkovits.miklos@med.semmelweis-univ.hu](mailto:palkovits.miklos@med.semmelweis-univ.hu)

**This PDF file includes:**

Figures SI Fig.S1 to Fig.S5

List of historical references along a timeline

Additional details of Methods section:

Table S1 – Antibody specifications

List of Primer sequences

Reference

Figures SI Fig.S1 to Fig.S5

SI Fig.S1

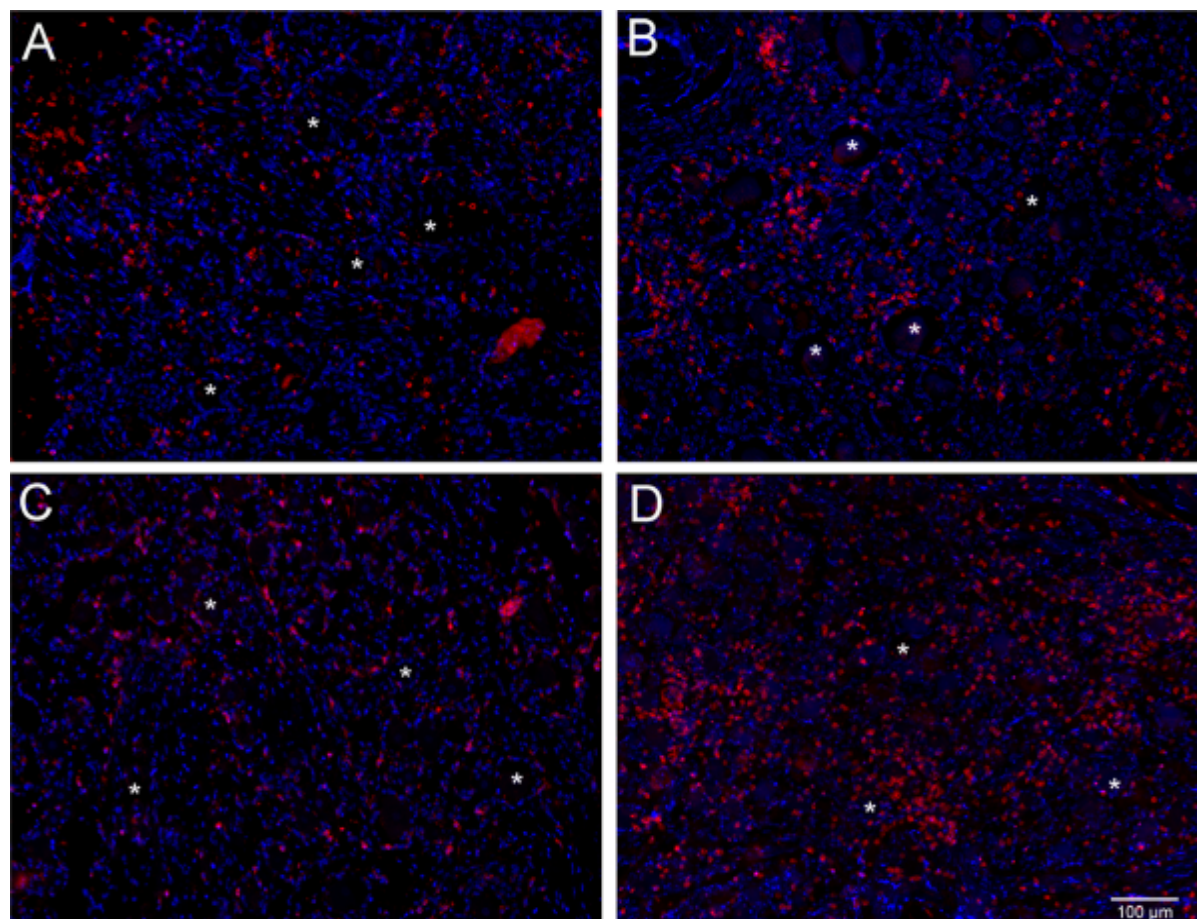*Accumulation of T cells in the trigeminal ganglion*

Trigeminal ganglia dissected from people following death due to drug overdose (A), traffic accident (C) and self-inflicted strangulation (B and D) show the presence of CD3 positive (T) cells (red fluorescence) and cell nuclei in blue (DAPI). A few of the ganglion cells are labelled with stars.

Scale bar: 100  $\mu\text{m}$

SI Fig.S2

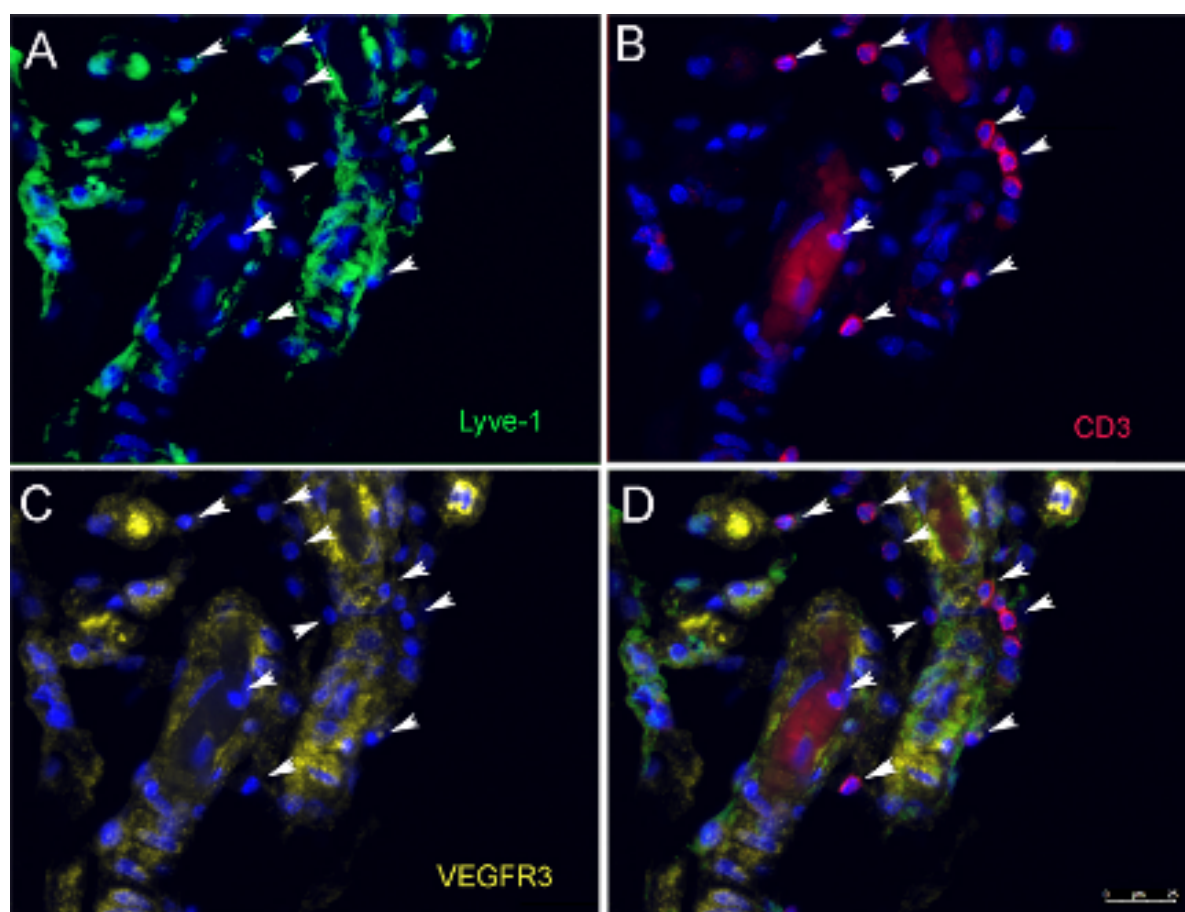

*Colocalization of two lymphatic markers in the wall of a small vessel and attached T cells in the subarachnoid space (SAS)*

A - LYVE1 (green fluorescence to mark Alexa-488) stained two vascular loops in the SAS in the same structure where VEGFR3 (C) staining (colored yellow for far-red fluorochrome, Alexa-650) is also present. CD3 positive (red fluorescence, colored for Alexa-594) T cells (B) are attached to the LMPCs as the overlay (D) demonstrates. Arrows point at T cells.

Scale bar: 25  $\mu$ m

SI Fig.S3

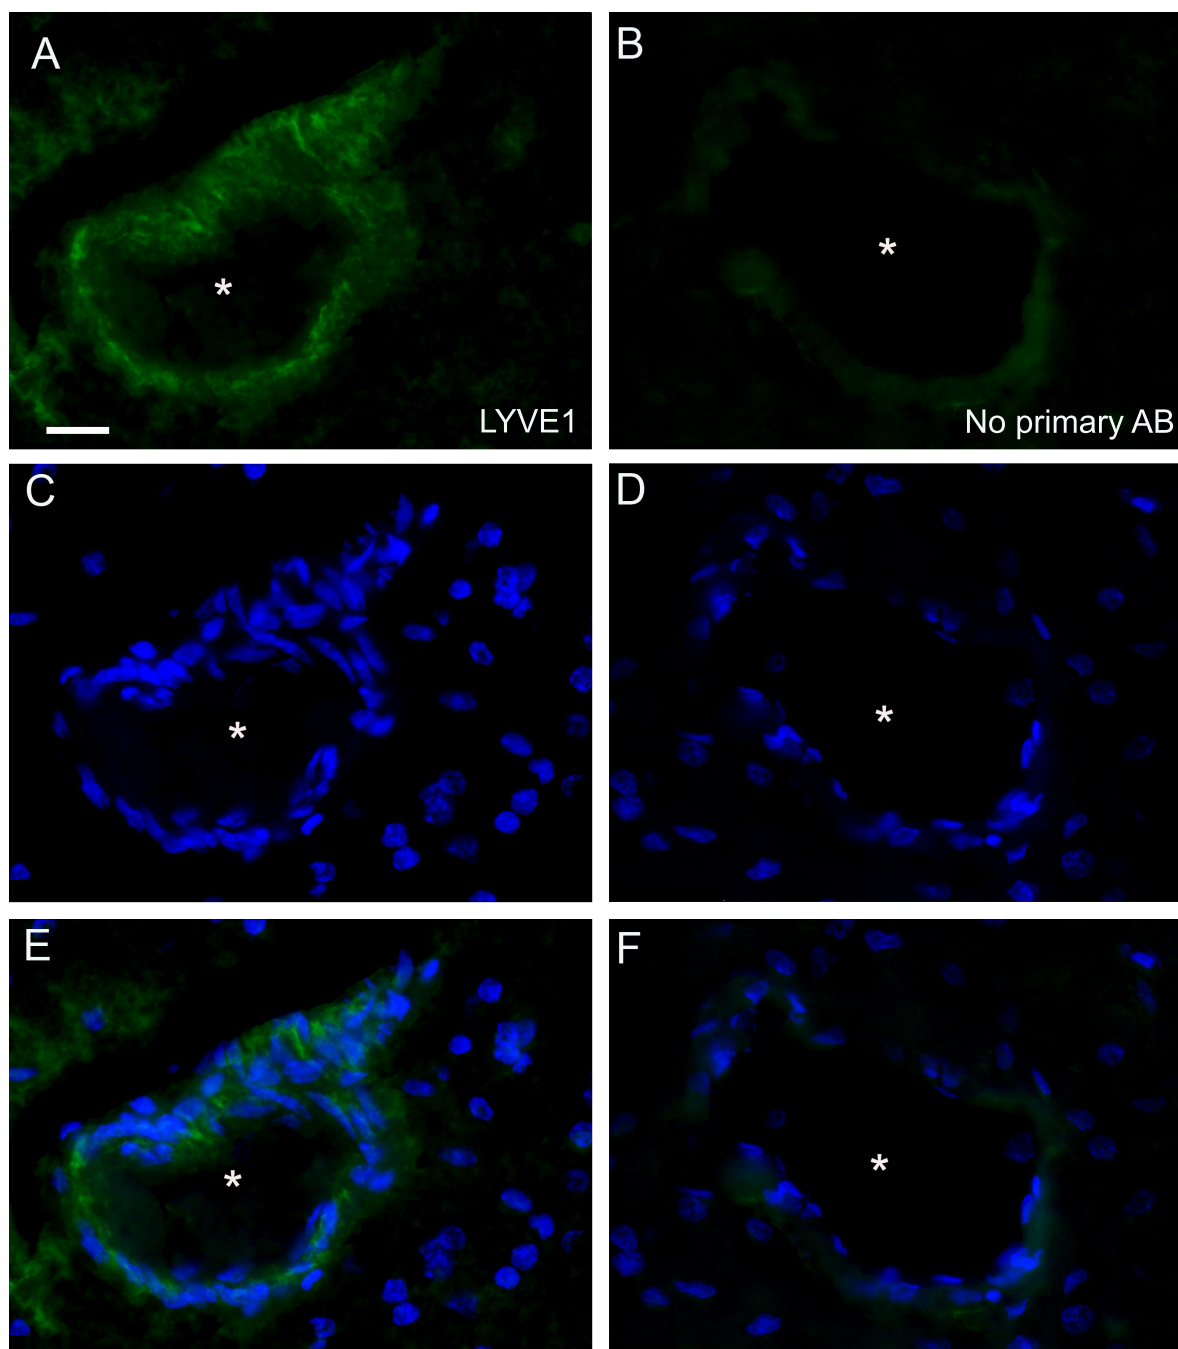

*Control amplified staining for LYVE1*

LYVE1 staining of vasculature in the parenchyma of a control section. A (LYVE1) and B (no primary antibody) were visualized using green fluorescence (Alexa-488). C and D are showing a nuclear staining with DAPI of sections in A and B, respectively and F are the overlay of green and blue fluorescence above. The asterisk depicts the vascular lumina.

Scale bar: 20  $\mu\text{m}$

SI Fig.S4

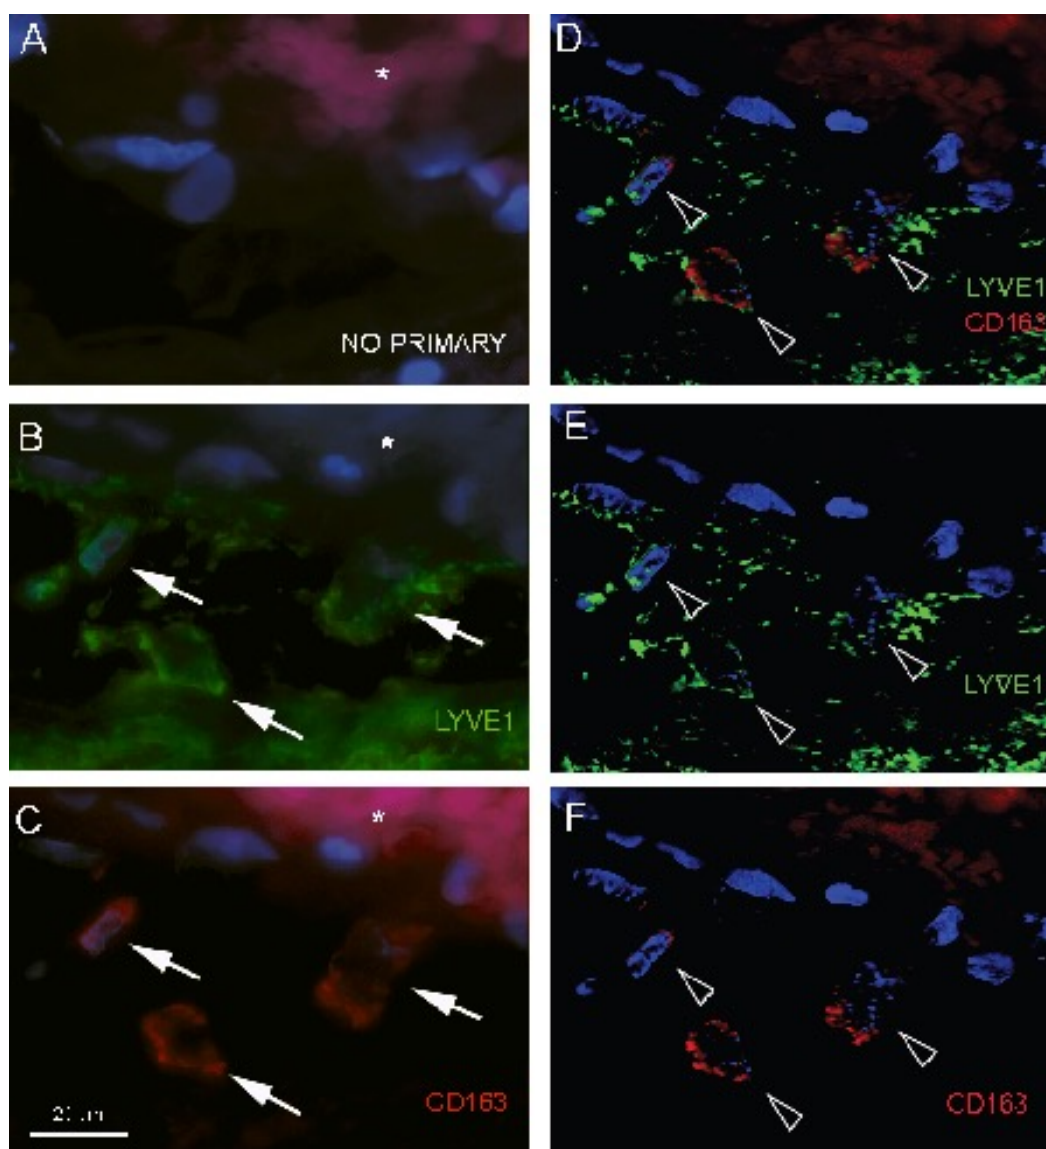

*Staining of barrier associated macrophages (BAM)s with the LYVE1 antibody*

After pretreatment as described in the paper a rabbit LYVE1 and a mouse CD163 antibody were used in a control section of a human brain for double immunostaining. An overnight incubation at 4°C with the LYVE1 antibody (1:100) was followed by an anti-rabbit Alexa-488 (1:1000) secondary for 1 hour at RT. Then the mouse primary antibody to CD163 (1:100) was applied O/N and developed using an anti-mouse Alexa-594 fluorochrome. Following DAPI and Sudan black staining the section was examined using a Leica DMI6000 inverted microscope. An adjacent section was processed the same way with no primary antibodies used. Panel A demonstrates the staining with no primary antibody showing no specific signal in either filter. Panels B and C are images of the same area on an adjacent section that received primary antibody. Arrows point at three cells that seem to be double labelled. Following deconvolution D, E and F show a 0.5  $\mu\text{m}$  thin optical section of the staining confirming the presence of both antigens in the same three cells (arrowheads). In the upper right corner of A and C a portion of a vessel can be seen with red blood cells causing autofluorescence in red (labelled with an asterisk). Scale bar: 25  $\mu\text{m}$

SI Fig.S5.

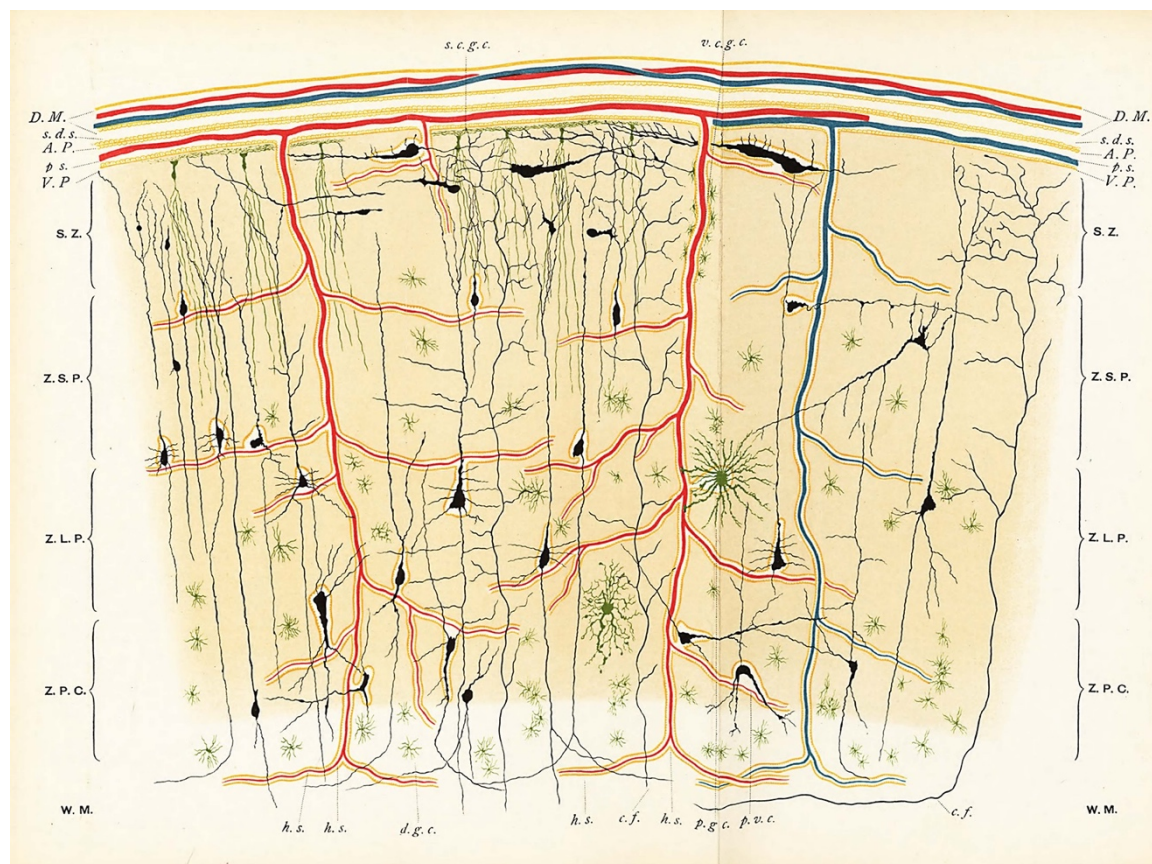

*Dr. John Batty Tuke's drawing of perivascular pathways in the human brain from 1894*

Reprinted from ref (1).

Dr. Tuke's legend to his drawing:

“DIAGRAMMATIC SCHEME OF THE CONSTITUENTS OF A CONVOLUTION. As regards the cells, fibers, and neuroglia, this diagram is founded on plates by Retzius, Cajal, and Andriezen. The arrangement of the vessels is purely diagrammatic. Endothelium is indicated by dotted yellow lines. Lymphatic spaces and channels are left white. , Dura mater ; s. d. s., Sub-dural space ; A. P., Arachno-pia; p. s., Pial space ; f-, Visceral pia; S. Z., Superficial zone; Z. S. P., Zone of small pyramids; Z.L.P.; Zone of large pyramids; Z. P. C., Zone of polymorphous cells; W. M., white matter; h. s., Hyaline sheath; p.g.c., Protoplasmic glia cells; s.c.g.c., superficial condensation of glia fibre cells; v. c. g. c., Vascular condensation of glia fibre cells.”

List of historical references

**Bold:** human studies

**1787**

**Mascagni, P.** Vasorum lymphaticorum corporis humani historia et ichnographia. (Pazzini Carli: Siena, 1787). PMID: -

**1816**

**Mascagni, P. & Bellini, G. B.** Isteria completa dei vasi linfatici. Vol. 2., 195 pp. (Eusebio Pacini e Figlio: Florence, 1816). PMID: -

**1869**

**Schwalbe, G.** Der Arachnoidalraum, ein Lymphraum und sein Zusammenhang mit dem Perichorioidealraum. Zbl Med Wiss 7, 465-467 (1869). PMID: -

**1875**

**Key, A. & Retzius, G.** Studien in der Anatomie des Nervensystems und des Bindegewebes. (Norstedt & Söner: Stockholm, 1875-1876). PMID: -

**1877**

Lewis, B. The relationships of the nerve-cells of the cortex to the lymphatic system of the brain. Proc Roy Soc Lond 26, 326-334 (1877). PMID: -

**1882**

**Tuke, J. B.** Note on the anatomy of the pia mater. Trans Med Chir Soc Edinb 1, 118-122 (1882). PMID: 29583735

**1884**

**Obersteiner, H.** The cerebral blood-vessels in health and disease. Brain 7, 289-309, doi: 10.1093/brain/7.3.289 (1884). PMID: -

**1890**

**Obersteiner, H.** The anatomy of the central nervous organs in health and in disease, pp. 174-175 (Charles Griffin: London, 1890). PMID: -

**1894**

**Tuke, J. B.** The Morisonian Lectures, Delivered before the Royal College of Physicians of Edinburgh: Session 1894. Edinb Med J 39, 673-683 (1894). PMID: -

**1910**

**Mott, F. W., Lond, M. D. & Lond, F. R. C. P.** The Oliver-Sharpey lectures on the cerebrospinal fluid. Lancet 176, 1-8 (1910). PMID: -

**1911**

Bruce, A. & Dawson, J. W. On the relations of the lymphatics of the spinal cord. J Pathol 15, 169-178 (1911). PMID: -

**1912**

**Zwillinger, H.** Die Lymphbahnen des oberen Nasalschnittes und deren Beziehungen zu den perimeningealen Lymphraumen. Arch Laryngol und Rhinol 26, 66-78 (1912). PMID: -

**1914**

Weed, L. H. Studies on cerebro-spinal fluid. No. II: The theories of drainage of cerebro-spinal fluid with an analysis of the methods of investigation. J Med Res 31, 21-49 (1914). PMID: 19972193

**1933**

Mortensen, O. A. & Sullivan, W. E. The cerebrospinal fluid and the cervical lymph nodes. Anat Rec 56, 359-363, doi: 10.1002/ar.1090560405 (1933). PMID: -

**1937**

Faber, W. M. The nasal mucosa and the subarachnoid space. *Am J Anat* 62, 121-148 (1937). PMID: -

**1939**

Yoffey, J. M. & Drinker, C. K. Some observations on the lymphatics of the nasal mucous membrane in the cat and monkey. *J Anat* 74, 45-52.3. (1939). PMID: 17104799

**1948**

Brierley, J. B. & Field, E. J. The connexions of the spinal sub-arachnoid space with the lymphatic system. *J Anat* 82, 153-166 (1948). PMID: 17105055

**1949**

Field, E. J. & Brierley, J. B. The retro-orbital tissues as a site of outflow of cerebrospinal fluid. *Proc Roy Soc Med* 42, 447-450 (1949). PMID: 18153751

**1957**

Bowsher, D. Pathways of absorption of protein from the cerebrospinal fluid: an autoradiographic study in the cat. *Anat Rec* 128, 23-39 (1957). PMID: 13458825

**1963**

Csanda, E., Zoltán, T.Ö. & Földi, M. Elevation of cerebrospinal fluid pressure in the dog after obstruction of cervical lymphatic channels. *Lancet* 281, 832 (1963). PMID: 14024097

Földi, M., Csanda, E., Obál, F., Madarász, I., Szeghy, G. & Zoltán, O. T. [On effects of ligation of the lymphatic vessels and lymph nodes of the neck on the central nervous system in animal experiments. I]. Über Wirkungen der Unterbindung der Lymphgefäße und Lymphknoten des Halses auf das Zentralnervensystem im Tierversuch. *Z Ges Exp Med* 137, 483-510 (1963). PMID: 14097189

Szeghy, G., Csanda, E., Kozma, M., Poberai, M., Gellért, A. & Földi, M. Oedema of optic nerve produced by lymphatic stasis in dog. *Lancet* 281, 832 (1963). PMID: 13979893

**1966**

Földi, M., Gellért, A., Kozma, M., Poberai, M., Zoltán, Ö. T. & Csanda, E. New contributions to the anatomical connections of the brain and the lymphatic system. *Acta Anat* 64, 498-505 (1966). PMID: 5957959

**1967**

Földi, M., Csanda, E., Zoltán, Ö.T. & Dobranovics, I. Oedema of the optic nerve and the retina as a consequence of experimental cervical lymphatic blockage. *Angiologica* 4, 341-347 (1967). PMID: 6075771

**1968**

Csanda, E., Földi, M., Obál, F. & Zoltán, Ö. T. Cerebral oedema as a consequence of experimental cervical lymphatic blockage. *Angiologica* 5, 55-63 (1968). PMID: 5637028

Földi, M., Csanda, E., Simon, M., Obál, F., Schneider, I., Dobranovics, I., Zoltán, Ö. T., Kozma, M. & Poberai, M. Lymphogenic haemangiopathy. "Prelymphatic" pathways in the wall of cerebral and cervical blood vessels. *Angiologica* 5, 250-262 (1968). PMID: 5699286

**1971**

Arnold, W., Nitze, H. R. & Ritter, R. Anatomical relations between the cerebrospinal fluid (CSF) and the lymphatic system in the region of the head and neck. *Arch Klin Exp Ohren Nasen Kehlkopfheilkd* 198, 361 (1971). PMID: 5569463

**1976**

Casley-Smith, J. R., Földi-Börcsök, E. & Földi, M. The prelymphatic pathways of the brain as revealed by cervical lymphatic obstruction and the passage of particles. *Br J Exp Pathol* 57, 179-188 (1976). PMID: 773400



**1977**

Casley-Smith, J. R., Clodius, L. & Földi, M. Experimental blood vascular and lymphatic occlusion in the rabbit ear and the effect of benzopyrones. *Arzneimittelforschung* 27, 379-382 (1977). PMID: 577157

Csanda, E., Joó, F., Somogyi, I., Szücs, A., Saal, M., Auguszt, A. & Komoly, S. Structural, ultrastructural and functional reactions of the brain after implanting yttrium 90 rods used in stereotactic neurosurgery. *Acta Neurochir (Wien) Suppl* 24, 139-147 (1977). PMID: 335803

**1979**

Jackson, R. T., Tigges, J. & Arnold, W. Subarachnoid space of the CNS, nasal mucosa, and lymphatic system. *Arch Otolaryngol* 105, 180-184 (1979). PMID: 85446

Mann, J. D., Butler, A. B., Johnson, R. N. & Bass, N. H. Clearance of macromolecular and particulate substances from the cerebrospinal fluid system of the rat. *J Neurosurg* 50, 343-348 (1979). PMID: 422986

**1980**

Bradbury, M. W. & Cole, D. F. The role of the lymphatic system in drainage of cerebrospinal fluid and aqueous humour. *J Physiol* 299, 353-365 (1980). PMID: 6155466

**1981**

Bradbury, M. W., Cserr, H. F. & Westrop, R. J. Drainage of cerebral interstitial fluid into deep cervical lymph of the rabbit. *Am J Physiol* 240, F329-F336 (1981). PMID: 7223890

**1984**

Pile-Spellman, J. M., McKusick, K. A., Strauss, H. W., Cooney, J. & Taveras, J. M. Experimental in vivo imaging of the cranial perineural lymphatic pathway. *AJNR Am J Neuroradiol* 5, 539-545 (1984). PMID: 6435420

Szentistványi, I., Patlak, C. S., Ellis, R. A. & Cserr, H. F. Drainage of interstitial fluid from different regions of rat brain. *Am J Physiol* 246, F835-F844 (1984). PMID: 6742132

**1985**

Rennels, M. L., Gregory, T. F., Blaumanis, O. R., Fujimoto, K. & Grady, P. A. Evidence for a 'paravascular' fluid circulation in the mammalian central nervous system, provided by the rapid distribution of tracer protein throughout the brain from the subarachnoid space. *Brain Res* 326, 47-63 (1985). PMID: 3971148

Shen, J. Y., Kelly, D. E., Hyman, S. & McComb, J. G. Intraorbital cerebrospinal fluid outflow and the posterior uveal compartment of the hamster eye. *Cell Tissue Res* 240, 77-87 (1985). PMID: 3995547

**1986**

Erlich, S. S., McComb, J. G., Hyman, S. & Weiss, M. H. Ultrastructural morphology of the olfactory pathway for cerebrospinal fluid drainage in the rabbit. *J Neurosurg* 64, 466-473 (1986). PMID: 3950724

**1989**

Erlich, S. S., McComb, J. G., Hyman, S. & Weiss, M. H. Ultrastructure of the orbital pathway for cerebrospinal fluid drainage in rabbits. *J Neurosurg* 70, 926-931 (1989). PMID: 2715821

**1990**

Manzo, R. P., Gomez, D. G. & Potts, D. G. Cerebrospinal fluid absorption in the rabbit. Inner ear pathways. *Acta Otolaryngol* 109, 389-396 (1990). PMID: 2360445

**1992**

Cserr, H. F. & Knopf, P. M. Cervical lymphatics, the blood-brain barrier and the immunoreactivity of the brain: a new view. *Immunol Today* 13, 507-512 (1992). PMID: 1463583

**1993**

Kida, S., Pantazis, A. & Weller, R. O. CSF drains directly from the subarachnoid space into nasal lymphatics in the rat. Anatomy, histology and immunological significance. *Neuropathol Appl Neurobiol* 19, 480-488 (1993). PMID: 7510047

**1994**

**Löwhagen, P., Johansson, B. B. & Nordborg, C.** The nasal route of cerebrospinal fluid drainage in man. A light-microscope study. *Neuropathol Appl Neurobiol* 20, 543-550 (1994). PMID: 7898616

**1997**

Brinker, T., Lüdemann, W., Berens von Rautenfeld, D. & Samii, M. Dynamic properties of lymphatic pathways for the absorption of cerebrospinal fluid. *Acta Neuropathol* 94, 493-498 (1997). PMID: 9386783

**1998**

Boulton, M., Armstrong, D., Flessner, M., Hay, J., Szalai, J. P. & Johnston, M. Raised intracranial pressure increases CSF drainage through arachnoid villi and extracranial lymphatics. *Am J Physiol* 275, R889-R896 (1998). PMID: 9728088

**1999**

**Killer, H. E., Laeng, H. & Groscurth, P.** Lymphatic capillaries in the meninges of the human optic nerve. *J Neuroophthalmol* 19, 222-228 (1999). PMID: 10608671

**2002**

**Podgrabinska, S., Braun, P., Velasco, P., Kloos, B., Pepper, M. S. & Skobe, M.** Molecular characterization of lymphatic endothelial cells. *Proc Natl Acad Sci U S A* 99, 16069-16074 (2002). PMID: 12446836

**2003**

Zakharov, A., Papaiconomou, C., Djenic, J., Midha, R. & Johnson, M. Lymphatic cerebrospinal fluid absorption pathways in neonatal sheep revealed by subarachnoid injection of Microfil. *Neuropathol Appl Neurobiol* 29, 563-573 (2003). PMID: 14636163

**2004**

**Johnston, M., Zakharov, A., Papaiconomou, C., Salmasi, G. & Armstrong D.** Evidence of connections between cerebrospinal fluid and nasal lymphatic vessels in humans, non-human primates and other mammalian species. *Cerebrospinal Fluid Res* 1, 2 (2004). PMID: 15679948

**2005**

Lüdemann, W., Berens von Rautenfeld, D., Samii, M. & Brinker, T. Ultrastructure of the cerebrospinal fluid outflow along the optic nerve into the lymphatic system. *Childs Nerv Syst* 21, 96-103 (2005). PMID: 15338179

**2006**

Goldmann, J., Kwidzinski, E., Brandt, C., Mahlo, J., Richter, D. & Bechmann, I. T cells traffic from brain to cervical lymph nodes via the cribroid plate and the nasal mucosa. *J Leukoc Biol* 80, 797-801 (2006). PMID: 16885505

Hadaczek, P., Yamashita, Y., Mirek, H., Tamas, L., Bohn, M. C., Noble, C., Park, J. W. & Bankiewicz, K. The “perivascular pump” driven by arterial pulsation is a powerful mechanism for the distribution of therapeutic molecules within the brain. *Mol Ther* 14, 69-78 (2006). PMID: 16650807

Nagra, G., Koh, L., Zakharov, A., Armstrong, D. & Johnston, M. Quantification of cerebrospinal fluid transport across the cribriform plate into lymphatics in rats. *Am J Physiol Regul Integr Comp Physiol* 291, R1383-R1389 (2006). PMID: 16793937

Walter, B. A., Valera, V. A., Takahashi, S. & Ushiki, T. The olfactory route for cerebrospinal fluid drainage into the peripheral lymphatic system. *Neuropathol Appl Neurobiol* 32, 388-396 (2006). PMID: 16866984

## 2007

**Gausas, R. E., Daly, T. & Fogt, F.** D2-40 expression demonstrates lymphatic vessel characteristics in the dural portion of the optic nerve sheath. *Ophthal Plast Reconstr Surg* 23, 32-36 (2007). PMID: 17237687

**Johnston, M., Armstrong, D. & Koh, L.** Possible role of the cavernous sinus veins in cerebrospinal fluid absorption. *Cerebrospinal Fluid Res* 4, 3 (2007). PMID: 17437642

## 2008

Carare, R. O., Bernardes-Silva, M., Newman, T. A., Page, A. M., Nicoll, J. A., Perry, V. H. & Weller, R. O. Solutes, but not cells, drain from the brain parenchyma along basement membranes of capillaries and arteries: significance for cerebral amyloid angiopathy and neuroimmunology. *Neuropathol Appl Neurobiol* 34, 131-144 (2008). PMID: 18208483

Furukawa, M., Shimoda, H., Kajiwara, T., Kato, S. & Yanagisawa, S. Topographic study on nerve-associated lymphatic vessels in the murine craniofacial region by immunohistochemistry and electron microscopy. *Biomed Res* 29, 289-296 (2008). PMID: 19129672

**Johanson, C. E., Duncan, J. A. 3rd, Klinge, P. M., Brinker, T., Stopa, E. G. & Silverberg, G. D.** Multiplicity of cerebrospinal fluid functions: New challenges in health and disease. *Cerebrospinal Fluid Res* 5, 10 (2008). PMID: 18479516

## 2010

**Birke, K., Lutjen-Drecoll, E., Kerjaschki, D. & Birke, M. T.** Expression of podoplanin and other lymphatic markers in the human anterior eye segment. *Invest Ophthalmol Vis Sci* 51, 344-354 (2010). PMID: 19737877

**Clapham, R., O'Sullivan, E., Weller, R. O. & Carare, R. O.** Cervical lymph nodes are found in direct relationship with the internal carotid artery: significance for the lymphatic drainage of the brain. *Clin Anat* 23, 43-47 (2010). PMID: 19918869

## 2012

Iliff, J. J., Wang, M., Liao, Y., Plogg, B. A., Peng, W., Gundersen, G. A., Benveniste, H., Vates, G. E., Deane, R., Goldman, S. A., Nagelhus, E. A. & Nedergaard, M. A paravascular pathway facilitates CSF flow through the brain parenchyma and the clearance of interstitial solutes, including amyloid beta. *Sci Transl Med* 4, 147ra111 (2012). PMID: 22896675

## 2013

**Chaitanya, G. V., Omura, S., Sato, F., Martinez, N. E., Minagar, A., Ramanathan, M., Guttman, B. W., Zivadinov, R., Tsunoda, I. & Alexander, J. S.** Inflammation induces neuro-lymphatic protein expression in multiple sclerosis brain neurovasculature. *J Neuroinflammation* 10, 125 (2013). PMID: 24124909

Iliff, J. J., Lee, H., Yu, M., Feng, T., Logan, J., Nedergaard, M. & Benveniste, H. Brain-wide pathway for waste clearance captured by contrast-enhanced MRI. *J Clin Invest* 123, 1299-1309 (2013). PMID: 23434588

Iliff, J. J., Wang, M., Zeppenfeld, D. M., Venkataraman, A., Plog, B. A., Liao, Y., Deane, R. & Nedergaard, M. Cerebral arterial pulsation drives paravascular CSF-interstitial fluid exchange in the murine brain. *J Neurosci* 33, 18190-18199 (2013). PMID: 24227727

Mathieu, E., Gupta, N., Macdonald, R. L., Ai, J. & Yücel, Y. H. In vivo imaging of lymphatic

drainage of cerebrospinal fluid in mouse. *Fluids Barriers CNS* 10, 35 (2013). PMID: 24360130

Rangroo Thrane, V., Thrane, A. S., Plog, B. A., Thiyagarajan, M., Iliff, J. J., Deane, R., Nagelhus, E. A. & Nedergaard, M. Paravascular microcirculation facilitates rapid lipid transport and astrocyte signaling in the brain. *Sci Rep* 3, 2582 (2013). PMID: 24002448

Thrane, V. R., Thrane, A. S., Plog, B. A., Thiyagarajan, M., Iliff, J. J., Deane, R., Nagelhus, E. A. & Nedergaard, M. Paravascular microcirculation facilitates rapid lipid transport and astrocyte signaling in the brain. *Sci Rep* 3, 2582 (2013). PMID: 24002448

Xie, L., Kang, H., Xu, Q., Chen, M. J., Liao, Y., Thiyagarajan, M., O'Donnell, J., Christensen, D. J., Nicholson, C., Iliff, J. J., Takano, T., Deane, R. & Nedergaard, M. Sleep drives metabolite clearance from the adult brain. *Science* 342, 373-377 (2013). PMID: 24136970

**Yang, L., Kress, B. T., Weber, H. J., Thiyagarajan, M., Wang, B., Deane, R., Benveniste, H., Iliff, J. J. & Nedergaard, M.** Evaluating glymphatic pathway function utilizing clinically relevant intrathecal infusion of CSF tracer. *J Transl Med* 11, 107 (2013). PMID: 23635358

## 2014

Kress, B. T., Iliff, J. J., Xia, M., Wang, M., Wei, H. S., Zeppenfeld, D., Xie, L., Kang, H., Xu, Q., Liew, J. A., Plog, B. A., Ding, F., Deane, R. & Nedergaard, M. Impairment of paravascular clearance pathways in the aging brain. *Ann Neurol* 76, 845-861 (2014). PMID: 25204284

## 2015

Aspelund, A., Antila, S., Proulx, S. T., Karlen, T. V., Karaman, S., Detmar, M., Wiig, H. & Alitalo, K. A dural lymphatic vascular system that drains brain interstitial fluid and macromolecules. *J Exp Med* 212, 991-999 (2015). PMID: 26077718

Coles, J. A., Myburgh, E., Ritchie, R., Hamilton, A., Rodgers, J., Mottram, J. C., Barrett, M. P. & Brewer, J. M. Intravital imaging of a massive lymphocyte response in the cortical dura of mice after peripheral infection by trypanosomes. *PLoS Negl Trop Dis* 9, e0003714 (2015). PMID: 25881126

**Eide, P. K. & Ringstad, G.** MRI with intrathecal MRI gadolinium contrast medium administration: a possible method to assess glymphatic function in human brain. *Acta Radiol Open* 4, 2058460115609635 (2015). PMID: 26634147

**Jessen, N. A., Munk, A. S., Lundgaard, I. & Nedergaard, M.** The glymphatic system: A beginner's guide. *Neurochem Res* 40, 2583-2599 (2015). PMID: 25947369

Lee, H., Xie, L., Yu, M., Kang, H., Feng, T., Deane, R., Logan, J., Nedergaard, M. & Benveniste, H. The effect of body posture on brain glymphatic transport. *J Neurosci* 35, 11034-11044 (2015). PMID: 26245965

**Louveau, A., Smirnov, I., Keyes, T. J., Eccles, J. D., Rouhani, S. J., Peske, J. D., Derecki, N. C., Castle, D., Mandell, J. W., Lee, K. S., Harris, T. H. & Kipnis, J.** Structural and functional features of central nervous system lymphatic vessels. *Nature* 523, 337-341 (2015). PMID: 26030524

**Schrödl, F., Kaser-Eichberger, A., Trost, A., Strohmaier, C., Bogner, B., Runge, C., Motloch, K., Bruckner, D., Laimer, M., Heindl, L. M. & Reitsamer, H. A.** Lymphatic markers in the adult human choroid. *Invest Ophthalmol Vis Sci* 56, 7406-7416 (2015). PMID: 26574800

## 2016

Achariyar, T. M., Li, B., Peng, W., Verghese, P. B., Shi, Y., McConnell, E., Benraiss, A., Kasper, T., Song, W., Takana, T., Holtzman, D. M., Nedergaard, M. & Deane, R. Glymphatic distribution of CSF-derived apoE into brain is isoform specific and suppressed

- during sleep deprivation. *Mol Neurodegener* 11, 74 (2016). PMID: 27931262
- Asgari, M., de Zélicourt, D. & Kurtcuoglu, V. Glymphatic solute transport does not require bulk flow. *Sci Rep* 6, 38635 (2016). PMID: 27929105
- Jin, B. J., Smith, A. J. & Verkman, A. S. Spatial model of convective solute transport in brain extracellular space does not support a “glymphatic” mechanism. *J Gen Physiol* 148, 489-501 (2016). PMID: 27836940
- Lohrberg, M. & Wilting, J. The lymphatic vascular system of the mouse head. *Cell Tissue Res* 366, 667-677 (2016). PMID: 27599481
- Morris, A. W., Sharp, M. M., Albargothy, N. J., Fernandes, R., Hawkes, C. A., Verma, A., Weller, R. O. & Carare, R. O. Vascular basement membranes as pathways for the passage of fluid into and out of the brain. *Acta Neuropathol* 131, 725-736 (2016). PMID: 26975356
- 2017**
- Absinta, M., Ha, S. K., Nair, G., Sati, P., Luciano, N. J., Palisoc, M., Louveau, A., Zaghoul, K. A., Pittaluga, S., Kipnis, J. & Reich, D. S.** Human and nonhuman primate meninges harbor lymphatic vessels that can be visualized noninvasively by MRI. *eLife* 6, pii: e29738 (2017). PMID: 28971799
- Antila, S., Karaman, S., Nurmi, H., Airavaara, M., Voutilainen, M. H., Mathivet, T., Chilov, D., Li, Z., Koppinen, T., Park, J. H., Fang, S., Aspelund, A., Saarma, M., Eichmann, A., Thomas, J. L. & Alitalo, K. Development and plasticity of meningeal lymphatic vessels. *J Exp Med* 214, 3645-3667 (2017). PMID: 29141865
- Bedussi, B., van der Wel, N.N., de Vos, J., van Veen, H., Siebes, M., VanBavel, E. & Bakker, E.N. Paravascular channels, cisterns, and the subarachnoid space in the rat brain: A single compartment with preferential pathways. *J Cereb Blood Flow Metab* 37, 1374-1385 (2017). PMID: 27306753
- Dobson, H., Sharp, M. M., Cumpsty, R., Criswell, T. P., Wellman, T., Finucane, C., Sullivan, J. M., Weller, R. O., Verma, A. & Carare, R. O. The perivascular pathways for influx of cerebrospinal fluid are most efficient in the midbrain. *Clin Sci (Lond)* 131, 2745-2752 (2017). PMID: 29021222
- Holter, K. E., Kehlet, B., Devor, A., Sejnowski, T. J., Dale, A. M., Omholt, S. W., Ottersen, O. P., Nagelhus, E. A., Mardal, K. A. & Pettersen, K. H. Interstitial solute transport in 3D reconstructed neuropil occurs by diffusion rather than bulk flow. *Proc Natl Acad Sci U S A* 114, 9894-9899 (2017). PMID: 28847942
- Ma, Q., Ineichen, B. V., Detmar, M. & Proulx, S. T. Outflow of cerebrospinal fluid is predominantly through lymphatic vessels and is reduced in aged mice. *Nat Commun* 8, 1434 (2017). PMID: 29127332
- Ratner, V., Gao, Y., Lee, H., Elkin, R., Nedergaard, M., Benveniste, H. & Tannenbaum, A. Cerebrospinal and interstitial fluid transport via the glymphatic pathway modeled by optimal mass transport. *Neuroimage* 152, 530-537 (2017). PMID: 28323163
- Santonja, C., Medina-Puente, C., del Castillo, C. S., Úbeda, A. C. & Rodríguez-Pinilla, S. M.** Primary effusion lymphoma involving cerebrospinal fluid, deep cervical lymph nodes and adenoids. Report of a case supporting the lymphatic connection between brain and lymph nodes. *Neuropathology* 37, 249-258 (2017). PMID: 27862361
- Smith, A. J., Yao, X., Dix, J. A., Jin, B. J. & Verkman, A. S. Test of the 'glymphatic' hypothesis demonstrates diffusive and aquaporin-4-independent solute transport in rodent brain parenchyma. *Elife* 6, pii: e27679 (2017). PMID: 28826498
- Wang, M., Ding, F., Deng, S., Guo, X., Wang, W., Iliff, J. J. & Nedergaard, M. Focal solute trapping and global glymphatic pathway impairment in a murine model of multiple microinfarcts. *J Neurosci* 37, 2870-2877 (2017). PMID: 28188218
- 2018**

- Da Mesquita, S., Louveau, A., Vaccari, A., Smirnov, I., Cornelison, R. C., Kingsmore, K. M., Contarino, C., Onengut-Gumuscu, S., Farber, E., Raper, D., Viar, K. E., Powell, R. D., Baker, W., Dabhi, N., Bai, R., Cao, R., Hu, S., Rich, S. S., Munson, J. M., Lopes, M. B., Overall, C. C., Acton, S. T. & Kipnis, J.** Functional aspects of meningeal lymphatics in ageing and Alzheimer's disease. *Nature* 560, 185-191 (2018). PMID: 30046111
- Eide, P. K., Vatnehol, S. A. S., Emblem, K. E. & Ringstad, G.** Magnetic resonance imaging provides evidence of glymphatic drainage from human brain to cervical lymph nodes. *Sci Rep* 8, 7194 (2018). PMID: 29740121
- Kumar, N. N., Lochhead, J. J., Pizzo, M. E., Nehra, G., Boroumand, S., Greene, G. & Thorne, R. G. Delivery of immunoglobulin G antibodies to the rat nervous system following intranasal administration: Distribution, dose-response, and mechanisms of delivery. *J Control Release* 286, 467-484 (2018). PMID: 30081144
- Ringstad, G., Valnes, L. M., Dale, A. M., Pripp, A. H., Vatnehol, S. S., Emblem, K. E., Mardal, K. A. & Eide, P. K.** Brain-wide glymphatic enhancement and clearance in humans assessed with MRI. *JCI Insight* 3, e121537 (2018). PMID: 29997300
- Semyachkina-Glushkovskaya, O., Abdurashitov, A., Dubrovsky, A., Pavlov, A., Shushunova, N., Maslyakova, G., Navolokin, N., Bucharskaya, A., Tuchin, V. & Kurths, J. The interaction between the meningeal lymphatics and blood-brain barrier. *Proc SPIE* 10495, Biophotonics and Immune Responses XIII, 104950J-1-104950J-5, doi: 10.1117/12.2289406 (2018). PMID: -
- Verheggen, I. C. M., Van Boxtel, M. P. J., Verhey, F. R. J., Jansen, J. F. A., Backes, W. H. Interaction between blood-brain barrier and glymphatic system in solute clearance. *Neurosci Biobehav Rev* 90, 26-33 (2018). PMID: 29608988
- 2019**
- Ahn, J. H., Cho, H., Kim, J. H., Kim, S. H., Ham, J. S., Park, I., Suh, S. H., Hong, S. P., Song, J. H., Hong, Y. K., Jeong, Y., Park, S. H. & Koh, G. Y. Meningeal lymphatic vessels at the skull base drain cerebrospinal fluid. *Nature* 572, 62-66 (2019). PMID: 31341278
- Caunca, M. R., De Leon-Benedetti, A., Latour, L., Leigh, R. & Wright, C. B.** Neuroimaging of cerebral small vessel disease and age-related cognitive changes. *Front Aging Neurosci* 11, 145 (2019). PMID: 31316367
- Hsu, M., Rayasam, A., Kijak, J. A., Choi, Y. H., Harding, J. S., Marcus, S. A., Karpus, W. J., Sandor, M. & Fabry, Z. Neuroinflammation-induced lymphangiogenesis near the cribriform plate contributes to drainage of CNS-derived antigens and immune cells. *Nat Commun* 10, 229 (2019). PMID: 30651548
- Meng, Y., Abrahao, A., Heyn, C. C., Bethune, A. J., Huang, Y., Pople, C. B., Aubert, I., Hamani, C., Zinman, L., Hynynen, K., Black, S. E. & Lipsman, N.** Glymphatics visualization after focused ultrasound-induced blood-brain barrier opening in humans. *Ann Neurol* 86, 975-980 (2019). PMID: 31525269
- 2020**
- Naganawa, S., Ito, R., Taoka, T., Yoshida, T. & Sone, M.** The space between the pial sheath and the cortical venous wall may connect to the meningeal lymphatics. *Magn Reson Med Sci*, 19, 1-4 (2020). PMID: 31611540
- Ringstad, G. & Eide, P. K.** Cerebrospinal fluid tracer efflux to parasagittal dura in humans. *Nat Commun* 11, 354 (2020). PMID: 31953399
- Song, E., Mao, T., Dong, H., Boisserand, L. S. B., Antila, S., Bosenberg, M., Alitalo, K., Thomas, J. L. & Iwasaki, A.** VEGF-C-driven lymphatic drainage enables immunosurveillance of brain tumours. *Nature* 577, 689-694 (2020). PMID: 31942068

SI Table S1 – Antibody specifications

| Primary Ab target         | Clone     | Vendor                   | Cat#          | Dilution |
|---------------------------|-----------|--------------------------|---------------|----------|
| Ms Podoplanin             | PDPN/1433 | enQuire BioReagents      | 10630-MSM1-P1 | 1:4000   |
| Ms CD45                   | 130       | BD Pharmingen            | 555480        | 1:1000   |
| Rbt CD3                   | SP7       | Abcam                    | Ab16669       | 1:1000   |
| Ms CD8                    | C8/144B   | Dako                     | M7103         | 1:1000   |
| Rbt FOXP3                 | 5H10L18   | Thermo Fisher Scientific | 700914        | 1:200    |
| Rbt ICAM1                 | EP1442Y   | Abcam                    | Ab53013       | 1:1000   |
| Rbt VCAM1                 | EPR5047   | Abcam                    | Ab134047      | 1:700    |
| Rbt Stabilin2             |           | Abcam                    | Ab121893      | 1:500    |
| Rbt CD62L                 |           | Abcam                    | Ab18959       | 1:200    |
| Rbt VEGFR3                |           | Abcam                    | Ab27278       | 1:500    |
| Rbt LYVE1                 |           | Millipore                | Ab2988        | 1:10 000 |
| Rbt von Willebrand Factor |           | Vector                   | VP-V686       | 1:5000   |
| Ms CD163                  | 10D6      | NeoMarkers               | Ms1103-S0     | 1:100    |

List of Primer sequences used for PCR:

- PDPN
  - Forward: AGAGCAACAACCTCAACGGGA
  - Reverse: TGTAGTCTCAGTGTCATCTTC
- LYVE1
  - Forward: TGGGGATCACCTTGTGAG
  - Reverse: AGCCATAGCTGCAAGTTTCAA
- VEGFR3
  - Forward: GCACTGCCACAAGAAGTACCT
  - Reverse: GCTGCACAGATAGCGTCCC
- PROX1
  - Forward: GGATGTTGAGTATTCAGTGGTGC
  - Reverse: CTGGGAAATTATGGTTGCTCCT
- ICAM1
  - Forward: CGTGGGGAGAAGGAGCTGAA
  - Reverse: CAGTGCGGCACGAGAAATTG
- VCAM1
  - Forward: TGGGCTGTGAATCCCCATCT
  - Reverse: GGGTCAGCGCGTGAATTGGTC
- SELL (CD62L)
  - Forward: CAGCCCTCTGTTACACAGCTT
  - Reverse: GCCCATAGTACCCACATCA
- HPRT1
  - Hs\_HPRT\_SG
 Qiagen QuantiTect Primer Assay (Catalog number QT00059066)

Reference

1. J. B. Tuke, The Morisonian Lectures, Delivered before the Royal College of Physicians of Edinburgh: Session 1894. *Edinb Med J* **39**, 673-683 (1894).
